# Supplementary material for: Identification of a New Rhoptry Neck Complex RON9/RON10 in the Apicomplexa Parasite Toxoplasma gondii
Source: PLoS One. 2012 Mar 12;7(3):e32457. doi: 10.1371/journal.pone.0032457 (PMC3299665; doi:10.1371/journal.pone.0032457)
Supplement: Table S1 — Primers used in this study. (XLSX) [file pone.0032457.s008.xlsx]

## Sheet: Feuil1
Primer	Sequence 5'→3'
RON9 gene
ML439	AAGCTTTGATGGTCTAAGAATGTGAA
ML440	GGTACCACCGATGCCACAGCGTCGAT
ML441	GCGGCCGCTGTTGCTCCCTCGCCCGCAT
ML442	TGATCAGCCGTTTCGCCGTCGTTACTT
ML503	AGCTTTGTCTCCATTCTGCTG
ML134	TGGCAGGCTACAGTGACAC
ML136	GAATGCAAGGTTTCGTGC
ML504	GAACAAAGGAGAAACATGGAAC
ML174	GGATCCATGATTCTGCTTCAGTACGGAGC
ML175	CTCGAGGCATGAGCGAACCGAATTGTG
ML200	ATGGAGAGTGTCAACCGGCCT
ML201	GAGAGCGGCGAGAATAAAGA
ML202	CCTGGTCCGCGGCTTGGCACA
ML494	GAATTATATACTGTGACTTGGACGAC
ML552	CTTCGTTCCTATCTTCGGTCA
ML553	AGGATGTCCAGTGCACTTGA
RON10 gene
ML176	GGATCCATGTCCTGGTCAAGAGTAAACAT
ML177	CTCGAGCTTCATCAGTCGGGACGTTCTGA
ML203	CTGTGAGCGCGATAGAGCAT
ML292	ATGAGCGTAATCTGGAACATCGTATGGGTA
ML554	TAGTGGATTCGAATGACACA
ML493	ATGCCTGAGGTTAACTGCCTC
ML420	TACTTCCAATCCAATTTAATGCGCGCTGCACAAAACGCTATCCC
ML421	TCCTCCACTTCCAATTTTAGCCCTAGGAGAAGAGTCTTCTGTCGCCGAA
Atg3 gene
ML339	cgcACTAGTgacgcgttcactgcgcc
ML340	GTCccgcggGAAAAGCGGAAGACAG
